# Supplementary material for: Deciphering molecular and cellular ex vivo responses to bispecific antibodies PD1-TIM3 and PD1-LAG3 in human tumors
Source: PubMed Central journal article supplement — J Immunother Cancer. 2022 Nov 1;10(11):e005548. doi: 10.1136/jitc-2022-005548 (PMC9628669; doi:10.1136/jitc-2022-005548), 2022-11-01
Supplement: jitc-2022-005548supp004.pdf [file jitc-2022-005548supp004.pdf]

## Supplementary Materials for

### **Deciphering molecular and cellular *ex vivo* responses to bispecific antibodies**

#### **PD1-TIM3 and PD1-LAG3 in human tumors**

Marina Natoli\*, Klas Hatje, Pratiksha Gulati, Fabian Junker, Petra Herzig, Zhiwen Jiang, Iakov I. Davydov, Markus Germann, Marta Trüb, Daniel Marbach, Adrian Zwick, Patrick Weber, Stefan Seeber, Mark Wiese, Didier Lardinois, Viola Heinzelmann-Schwarz, Robert Rosenberg, Lothar Tietze, Kirsten D. Merz, Pablo Umaña, Christian Klein, Laura Codarri-Deak, Henry Kao\* and Alfred Zippelius\*.

\*Corresponding authors. Email: [marina.natoli@unibas.ch](mailto:marina.natoli@unibas.ch), [alfred.zippelius@usb.ch](mailto:alfred.zippelius@usb.ch), [henry.kao@roche.com](mailto:henry.kao@roche.com)

#### **This file includes:**

Figs. S1 to S7

Tables S1 to S6

References (1 to 3)

**A**

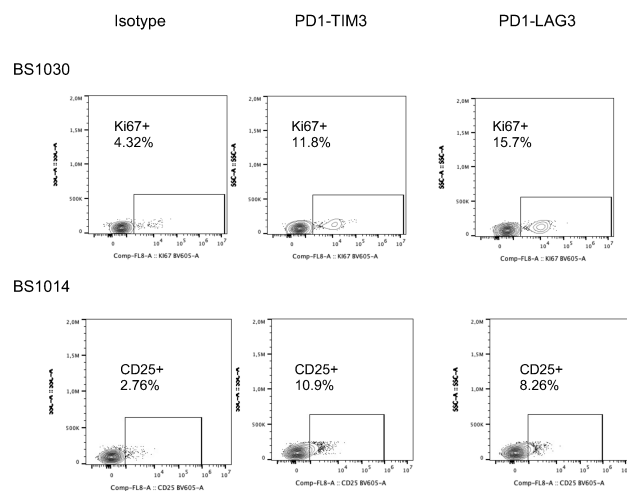

**B**

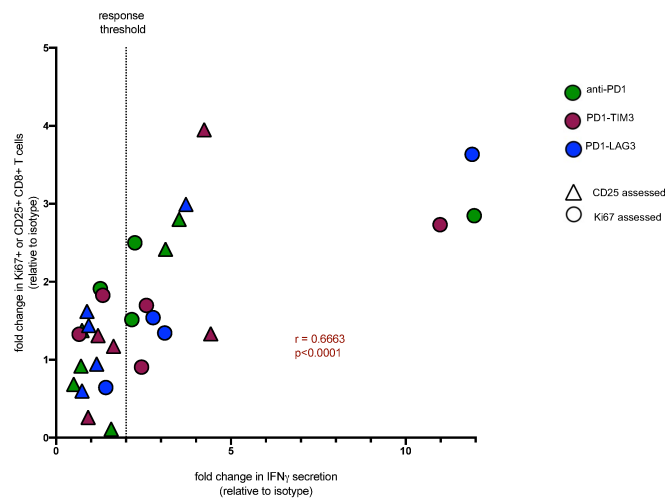

**C**

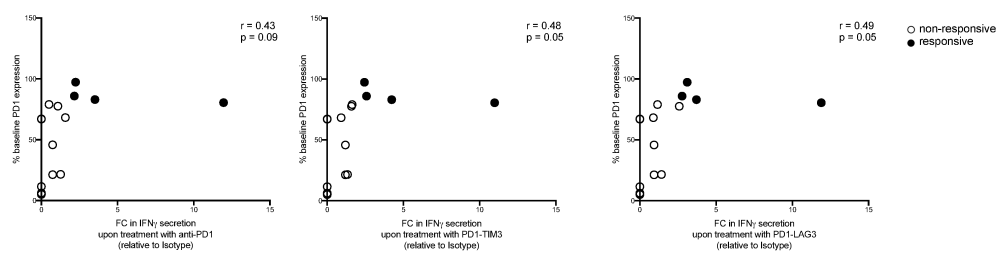

**Fig. S1.**

(A) Representative dot plots showing expression of Ki67 or CD25 on CD8<sup>+</sup> T cells from patients BS1030 or BS1014 tumor suspension in indicated treatment conditions. (B) Correlation between fold change in IFN- $\gamma$  secretion and fold change in activated CD8<sup>+</sup> T cells (according to either Ki67 or CD25 expression), comparing each treated sample (n of patients=11, color-coded by treatment) to the isotype control. Correlation coefficient  $r$  and  $p$  value are indicated (spearman's correlation). (C) Linear correlation of the fold change (FC) in IFN- $\gamma$  secretion induced by each compound and the baseline PD-1 expression in each tumor sample assessed (n= 16). Correlation coefficient ( $r$ ) and  $p$  value are indicated.

**A**

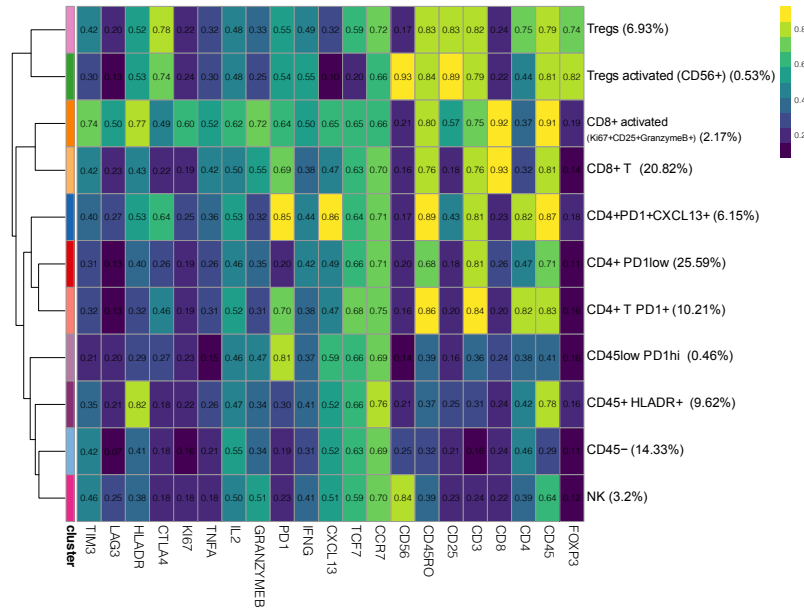

**B**

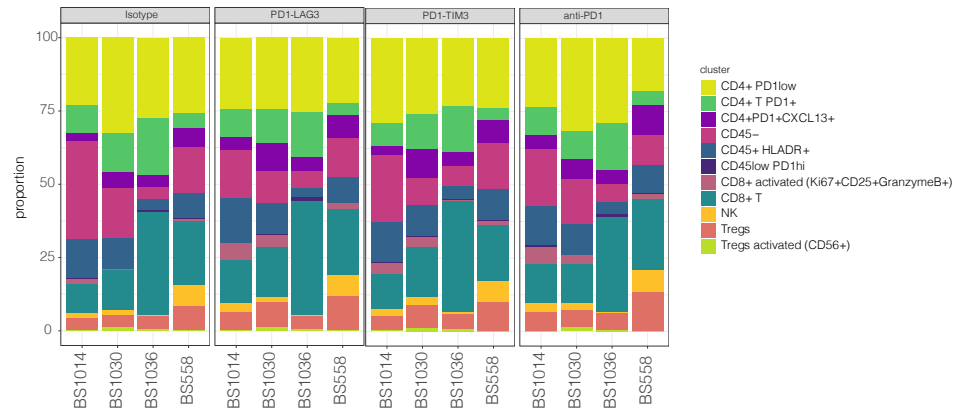

**C**

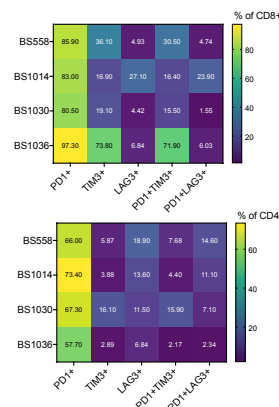

**D**

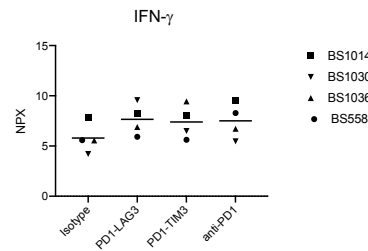



**Fig. S2.**

(A) Heatmap of the median (logicle-transformed) marker expression of lineage and functional markers across all cells analysed from pooled conditions clustered using *FlowSOM* and *ConsensusClusterPlus* and annotated. Color scale indicates the level of expression, dendograms indicate Euclidean distance metric and average linkage of cell types. (B) Per-patient bar plots indicating the proportion of each cell type in each treatment condition. (C) Heatmaps showing frequency of expression of PD1, TIM3, LAG3 and PD1/TIM3 or PD1/LAG3 co-expression on CD8<sup>+</sup> (top) or CD4<sup>+</sup> (bottom) T cells from the four indicated responsive patient tumor suspensions at the baseline. (D) NPX of IFNG (IFN- $\gamma$ ) measured by Olink technology in the supernatant of the four responsive tumor suspension across different treatment vs control comparisons.

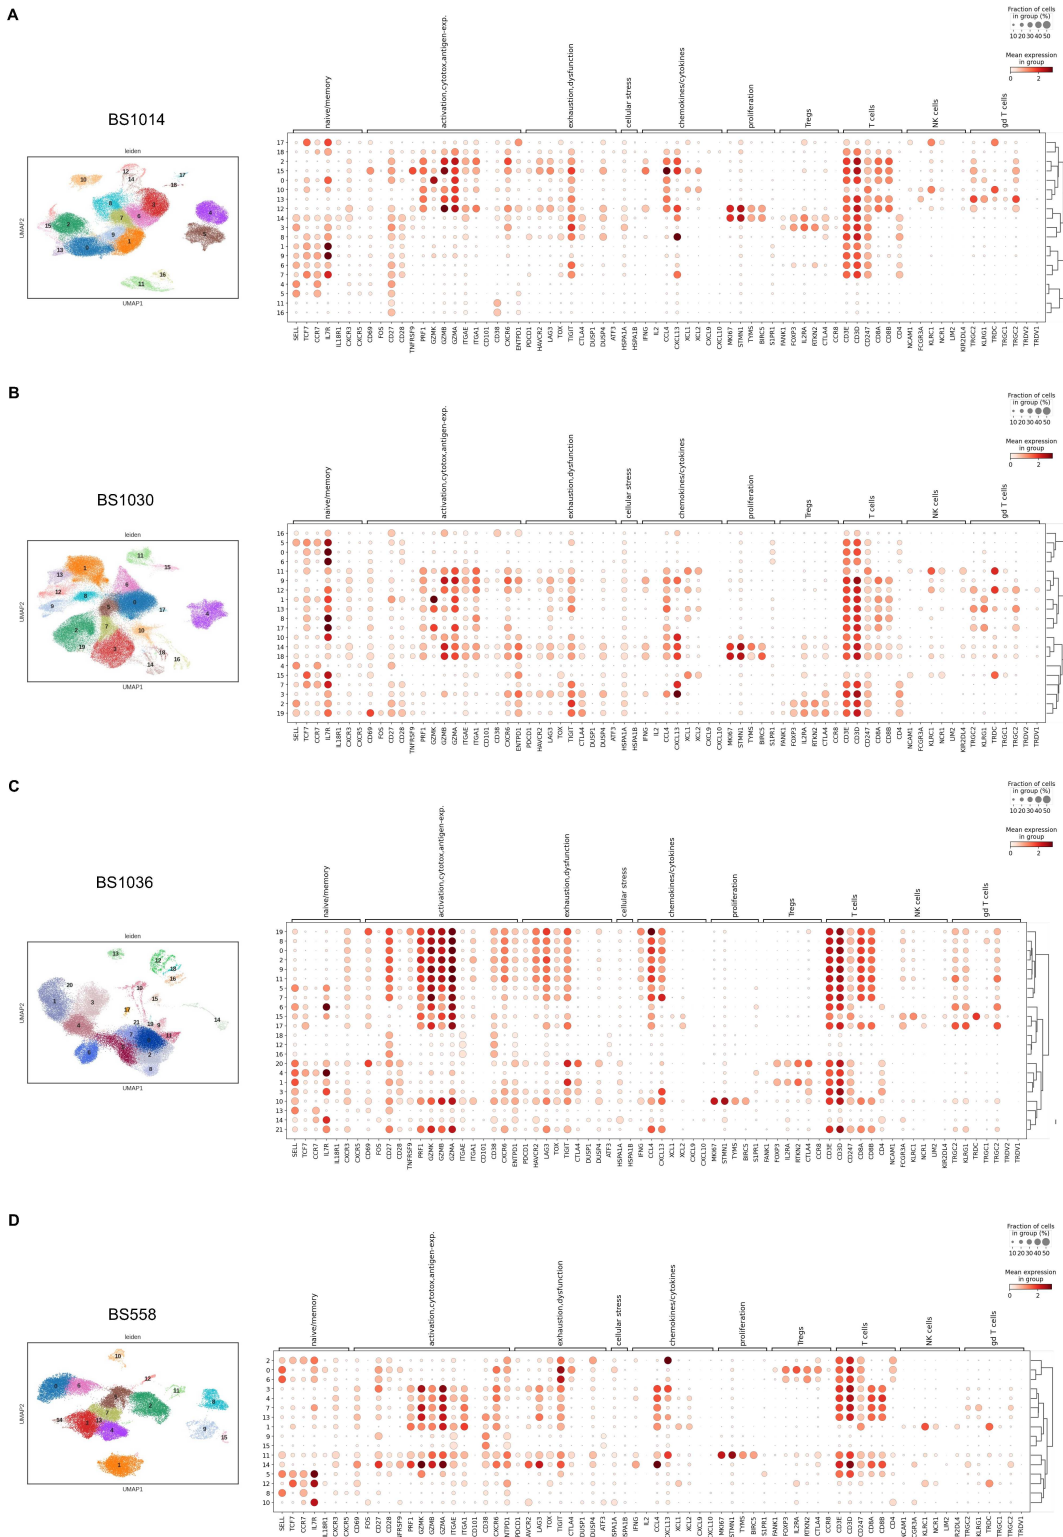

**Fig. S3.**

(A-D) Per-patient UMAP projections showing Leiden clustering from *Besca* standard workflow (left) and dot plots (right) showing mean expression and fraction of cells expression selected gene markers in each Leiden cluster, calculated by COSG (1).

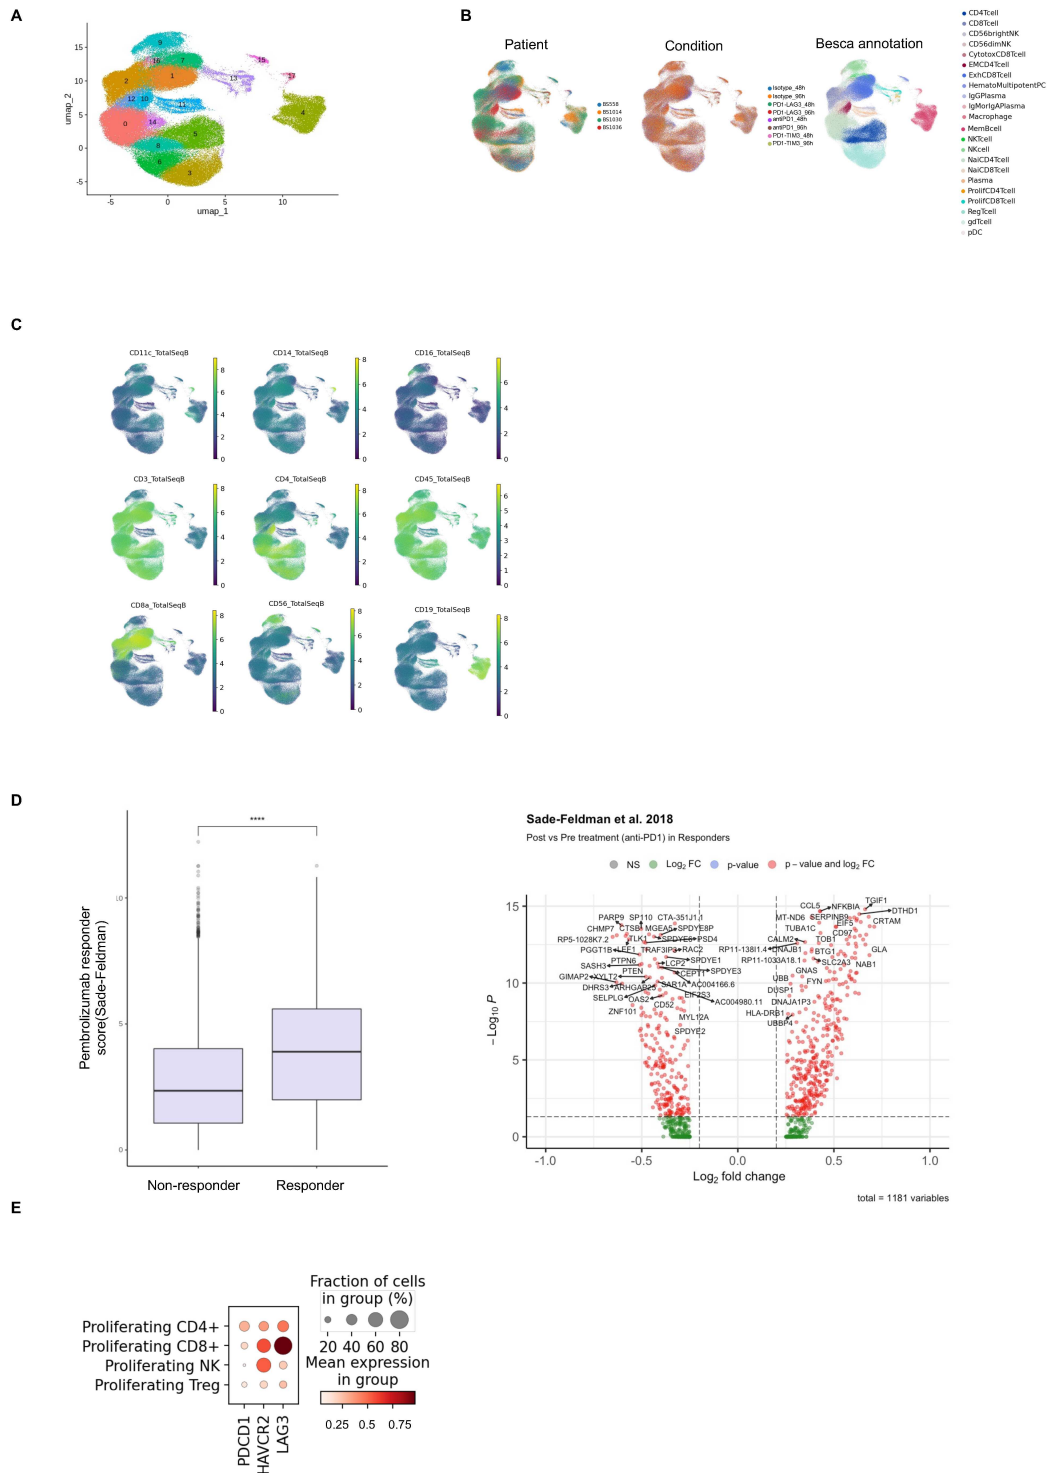

**Fig. S4.**

(A) UMAP projection showing Leiden clustering of merged and batched corrected (BBKNN) cells merged from all patients. (B) UMAP projections of final and merged scRNAseq dataset displaying cells belonging to either different patients (left) or conditions (treatment and timepoint; middle) and annotated using *Besca* automated cell labels. (C) UMAP projections showing the expression of Antibody-Derived Tags (ADT) from the CITE-seq library, confirming cell type annotation on a protein level. (D) Boxplots (left) showing a significant difference (Wilcoxon paired signed rank test) in the PD1 response score, calculated as described in the methods, between all cells derived from anti-PD1 non-responders and those deriving from anti-PD1 responders from the Sade-Feldman (2) dataset. Volcano plot showing differential expression of genes in responders to anti-PD1 from the Sade-Feldman (2) dataset, comparing pre and post treatment conditions. The genes were used to derive the anti-PD1 response score. (E) Dot plot showing mRNA expression of *LAG3*, *HAVCR2* and *PDCDI* in the different proliferating cell types from pooled conditions.

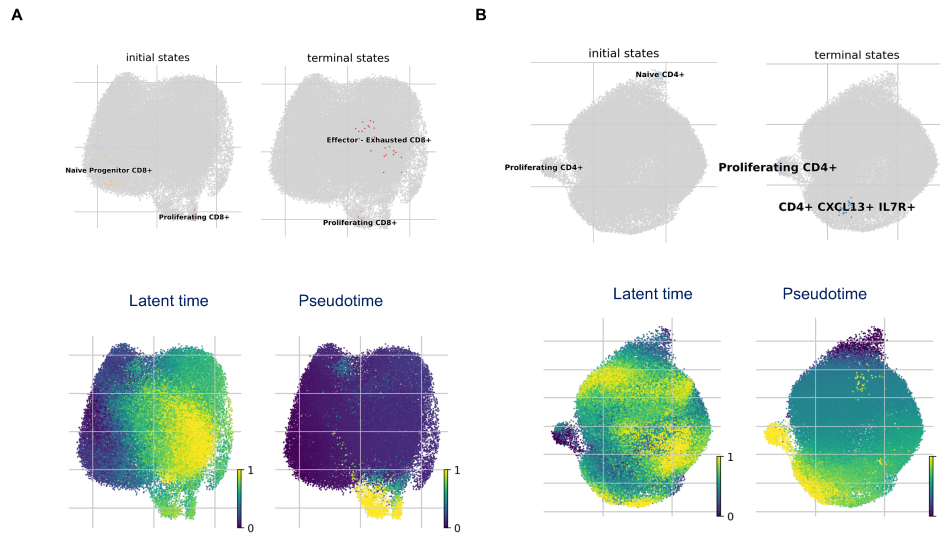

**Fig. S5.**

(A) UMAP of CD8<sup>+</sup> T cell subsets from pooled conditions (all treated cells from the 96 hour timepoint) with putative initial (up left) and terminal (up right) states, latent time (bottom left) and pseudotime (bottom right), calculated using *scVelo* (3). The latent time is a measure of transcriptional dynamics which accounts for speed and direction of motion, while the pseudotime indicates the distance between fates without recognising their temporal position (3). (B) UMAP of conventional CD4<sup>+</sup> T cell subsets from pooled conditions (all treated cells from the 96 hour timepoint) with putative initial (up left) and terminal (up right) states, latent time (bottom left) and pseudotime (bottom right) calculated using *scVelo* (3).

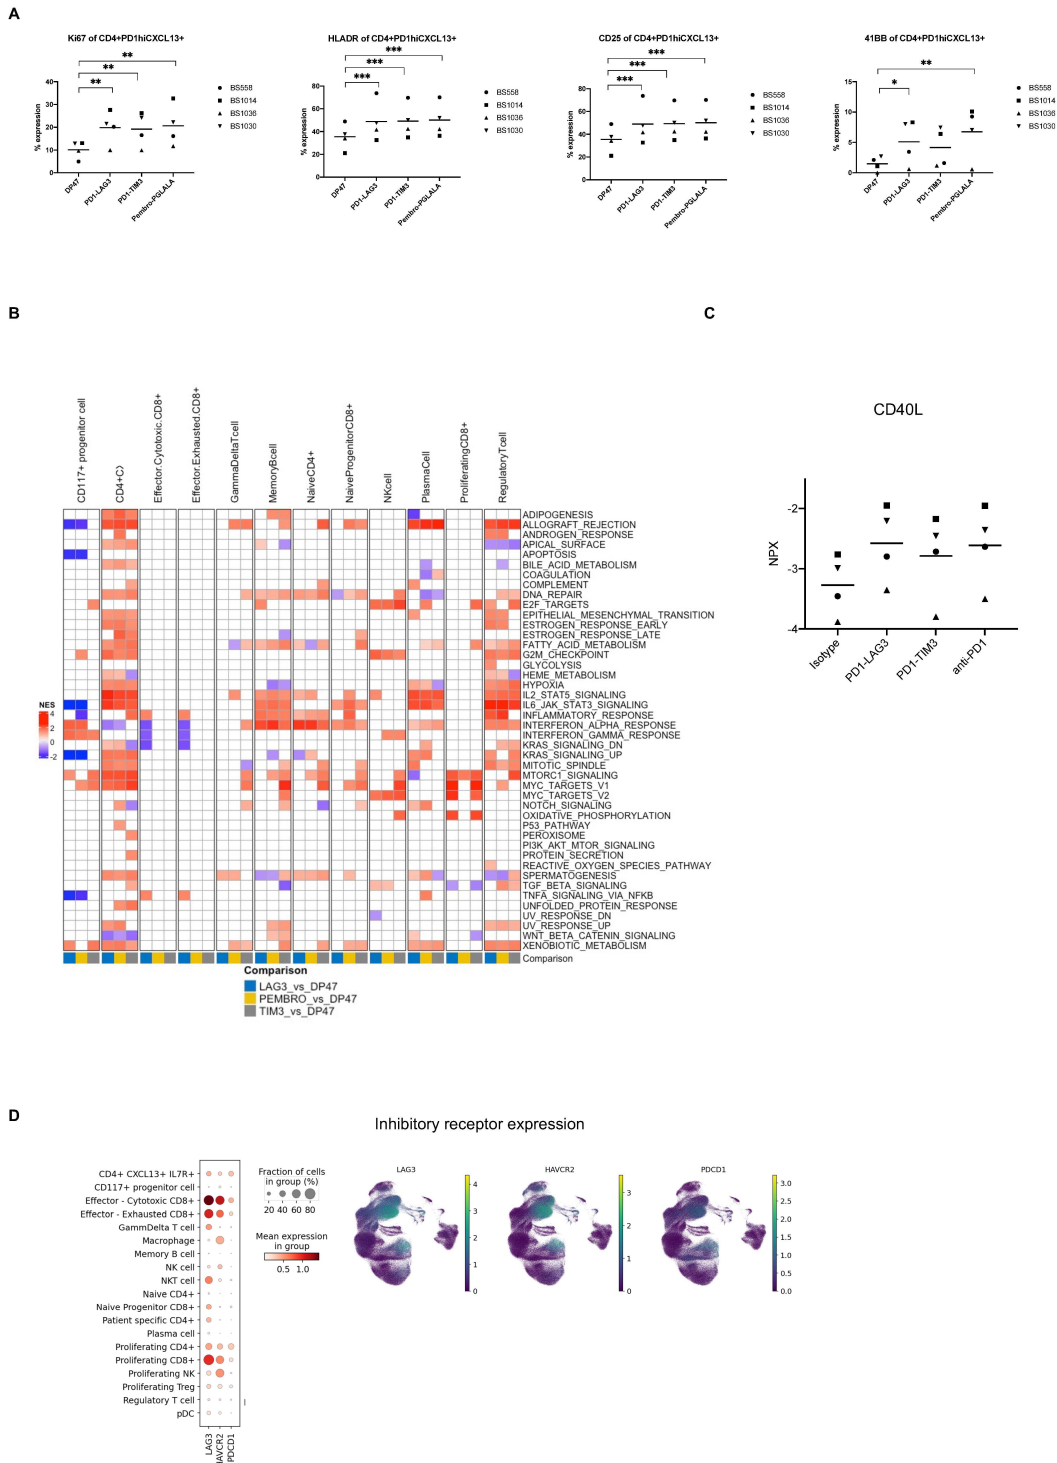

**Fig. S6.**

(A) Percentage expression of Ki67, HLA-DR, 41BB and CD25 on the CD4<sup>+</sup>PD1<sup>+</sup>CXCL13<sup>+</sup> population in the four responsive tumor suspension in different treatment conditions, manually gated, as shown in Figure S7B. (B) Heatmap of gene set enrichment analysis run on the pseudobulk outputs for each cell type, showing the normalized enrichment score (NES) for each Hallmark pathway within each cell type and comparison (treatment vs control, indicated in the colour legend at the bottom) at the 96 hour timepoint. Only pathways with significant enrichment are coloured (GSEA;  $p < 0.05$ ). (C) NPX of CD40L measured by Olink technology in the supernatant of the four responsive tumor suspension across different treatment vs control comparisons ( $FDR < 0.05$ ). (D) Dot plot (left) and UMAP projections (right) showing expression of *LAG3*, *HAVCR2* and *PDCD1* in the different annotated cell typed from pooled conditions. Dot plot (right) showing expression of known LAG3, PD1 and TIM3 ligands in the different annotated cell typed from pooled conditions.



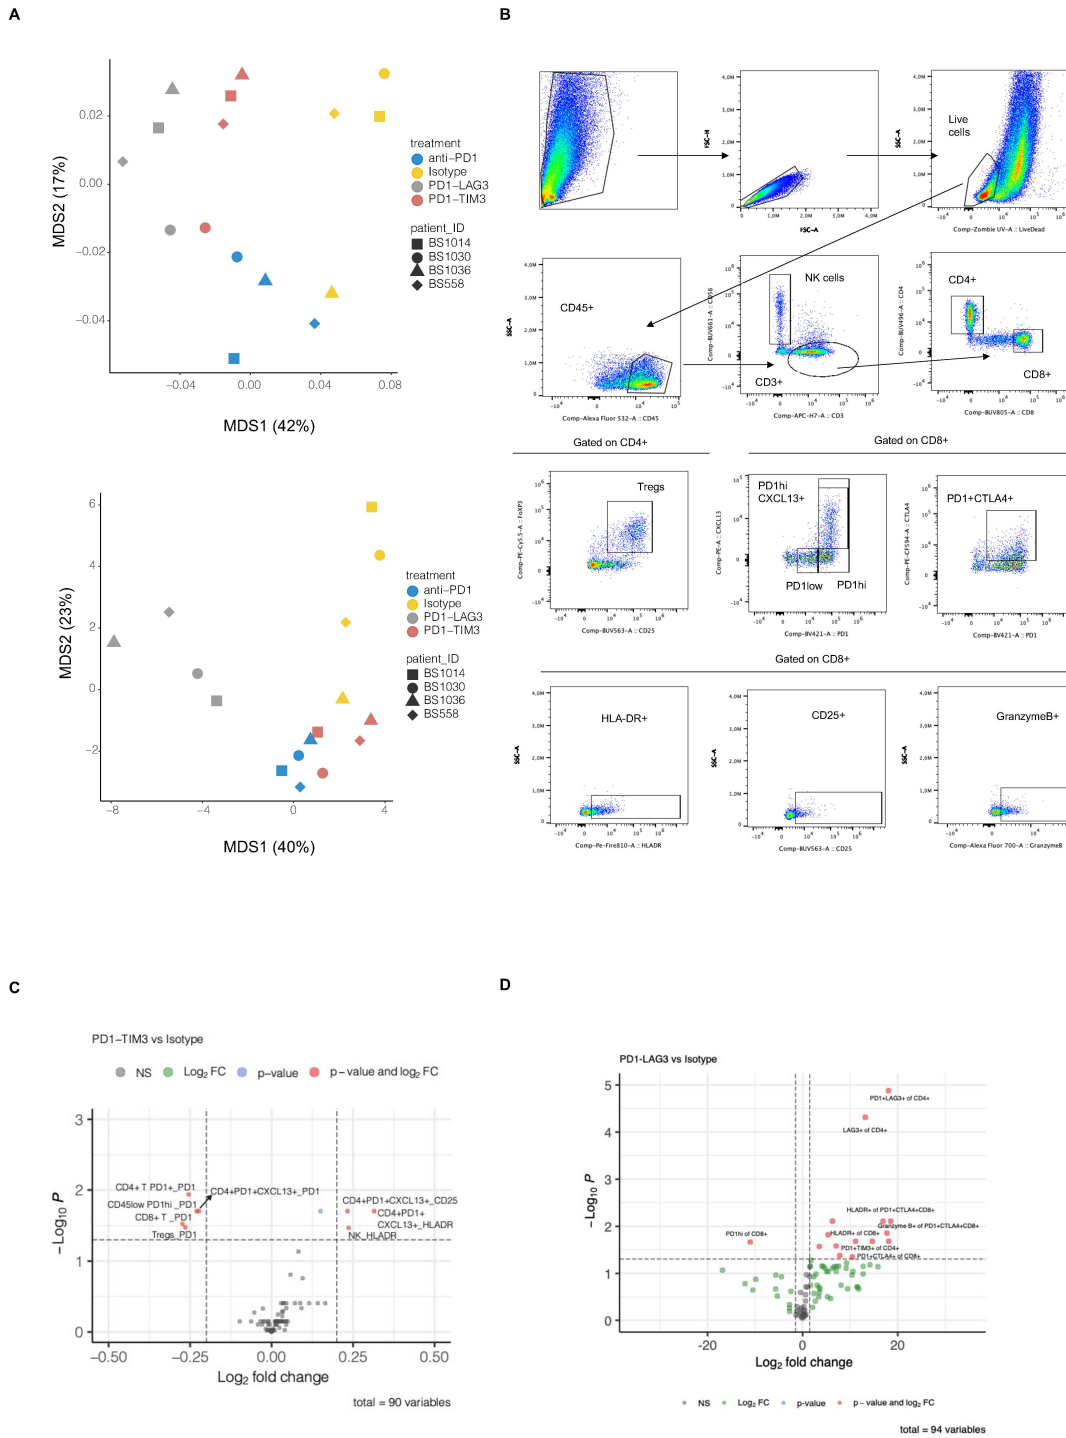

**Fig. S7.**

(A) Top: Multidimensional scaling plots of each indicated sample, based on the scaled and transformed fluorescence intensities of each marker on all cell populations and batch-adjusting by patient (using *ComBat* in R). Bottom: Multidimensional scaling plots of each indicated sample, based on manually gated frequencies of each marker on all cell populations, manually gated, and batch-adjusting by patient (using *ComBat* in R), indicating the distance in similarity between samples. (B) Representative schematic showing gating strategy for main lymphoid populations within tumor suspensions. (C) Volcano plot depicting differentially expressed markers ( $\log F_c > |1.5|$ , adjusted p value  $< 0.05$ ) within each cell subset across patients in the PD1-TIM3 treated condition compared to the isotype control. The colour legend indicates significant values according to the indicated thresholds. The values were obtained by running a linear mixed model using the median marker intensities of each population based on *FlowSOM* clustering. (D) Volcano plot depicting differentially expressed markers ( $\log F_c > |1.5|$ , adjusted p value  $< 0.05$ ) within each cell subset across patients in the PD1-LAG3 treated condition compared to the isotype control. The colour legend indicates significant values according to the indicated thresholds. The values were obtained by running a linear mixed model using the manually gated frequencies of each marker on each population.

**Table S1.**

List of patient sample characteristics and their functional response to treatment *in vitro*  
(b.d.=below detection limit; n.d.= not done; n.a.=not enough CD8+ events available).

| Patient | Cancer type           | Sample type      | Log2 fold change in IFN $\gamma$ PD1-TIM3 vs Isotype | Log2 fold change in IFN $\gamma$ PD1-LAG3 vs Isotype | Log2 fold change in IFN $\gamma$ anti-PD1 vs Isotype | Fold change in CD25 expression PD1-TIM3 vs Isotype | Fold change in CD25 expression PD1-LAG3 vs Isotype | Fold change in CD25 expression anti-PD1 vs Isotype | Fold change in Ki67 expression PD1-TIM3 vs Isotype | Fold change in Ki67 expression PD1-LAG3 vs Isotype | Fold change in Ki67 expression anti-PD1 vs Isotype |
|---------|-----------------------|------------------|------------------------------------------------------|------------------------------------------------------|------------------------------------------------------|----------------------------------------------------|----------------------------------------------------|----------------------------------------------------|----------------------------------------------------|----------------------------------------------------|----------------------------------------------------|
| BS-172  | RCC                   | tumor digest     | b.d.                                                 | b.d.                                                 | b.d.                                                 | n.d.                                               | n.d.                                               | n.d.                                               | 0.82                                               | 0.885                                              | 0.925                                              |
| BS-199  | NSCLC                 | pleural effusion | 0.671574148                                          | 1.369012042                                          | 0.1213565                                            | 1.33333333                                         | n.a.                                               | 2.41666667                                         | n.d.                                               | n.d.                                               | n.d.                                               |
| BS-202  | NSCLC                 | pleural effusion | -0.125617866                                         | -0.179031296                                         | 0.6561898                                            | 0.2605042                                          | 1.62064826                                         | 0.11044418                                         | n.d.                                               | n.d.                                               | n.d.                                               |
| BS-217  | RCC                   | tumor digest     | b.d.                                                 | b.d.                                                 | b.d.                                                 | n.d.                                               | n.d.                                               | n.d.                                               | n.a.                                               | n.a.                                               | n.a.                                               |
| BS-403  | SKCC                  | tumor digest     | b.d.                                                 | b.d.                                                 | b.d.                                                 | n.d.                                               | n.d.                                               | n.d.                                               | n.a.                                               | n.a.                                               | n.a.                                               |
| BS-494  | SKCC                  | tumor digest     | 0.417478072                                          | 0.504463937                                          | 0.3403863                                            | n.d.                                               | n.d.                                               | n.d.                                               | 1.827057                                           | 0.644351                                           | 1.910739                                           |
| BS-558  | EOC                   | tumor digest     | 1.367594543                                          | 1.471664348                                          | 1.1149857                                            | n.d.                                               | n.d.                                               | n.d.                                               | 1.69657                                            | 1.540897                                           | 1.514512                                           |
| BS-688  | EOC                   | tumor digest     | 0.181769618                                          | 0.264774785                                          | 1.8074517                                            | n.d.                                               | n.d.                                               | n.d.                                               | n.a.                                               | n.a.                                               | n.a.                                               |
| BS-796  | EOC                   | tumor digest     | b.d.                                                 | b.d.                                                 | b.d.                                                 | n.d.                                               | n.d.                                               | n.d.                                               | 1.121756                                           | 0.946108                                           | 1.047904                                           |
| BS-899  | EOC                   | tumor digest     | -0.607082255                                         | -0.436027921                                         | -0.491414                                            | 1.32673267                                         | 0.59919028                                         | 0.91902834                                         | n.d.                                               | n.d.                                               | n.d.                                               |
| BS-965  | NSCLC                 | tumor digest     | b.d.                                                 | b.d.                                                 | b.d.                                                 | n.d.                                               | n.d.                                               | n.d.                                               | n.a.                                               | n.a.                                               | n.a.                                               |
| BS-969  | EOC                   | tumor digest     | 0.715289174                                          | 0.214059572                                          | -0.987113                                            | 1.17322835                                         | 0.94488189                                         | 0.68503937                                         | n.d.                                               | n.d.                                               | n.d.                                               |
| BS-988  | NSCLC                 | tumor digest     | 0.260821334                                          | -0.103274017                                         | -0.430851                                            | 1.31174089                                         | 1.43894389                                         | 1.37623762                                         | n.d.                                               | n.d.                                               | n.d.                                               |
| BS-1014 | NSCLC                 | tumor digest     | 2.081584019                                          | 1.892021427                                          | 1.814856                                             | 3.94927536                                         | 2.99275362                                         | 2.80072464                                         | n.d.                                               | n.d.                                               | n.d.                                               |
| BS-1030 | NSCLC                 | tumor digest     | 3.457241008                                          | 3.572910327                                          | 3.5800249                                            | n.d.                                               | n.d.                                               | n.d.                                               | 2.731481                                           | 3.634259                                           | 2.847222                                           |
| BS-1036 | Melanoma (metastasis) | tumor digest     | 1.289334823                                          | 1.634327435                                          | 1.1709954                                            | n.d.                                               | n.d.                                               | n.d.                                               | 0.90625                                            | 1.34375                                            | 2.5                                                |
| BS-1047 | NSCLC                 | tumor digest     | b.d.                                                 | b.d.                                                 | b.d.                                                 | n.d.                                               | n.d.                                               | n.d.                                               | 0.955437                                           | 1.003565                                           | 1.240642                                           |
| BS-1054 | NSCLC                 | tumor digest     | b.d.                                                 | b.d.                                                 | b.d.                                                 | n.d.                                               | n.d.                                               | n.d.                                               | 0.843195                                           | 0.869822                                           | 1.142012                                           |
| LA-062  | CRC                   | tumor digest     | b.d.                                                 | b.d.                                                 | b.d.                                                 | n.d.                                               | n.d.                                               | n.d.                                               | n.a.                                               | n.a.                                               | n.a.                                               |
| LI-005  | CRC                   | tumor digest     | b.d.                                                 | b.d.                                                 | b.d.                                                 | n.d.                                               | n.d.                                               | n.d.                                               | 1.141791                                           | 0.614179                                           | 1.186567                                           |
| LI-043  | CRC                   | tumor digest     | b.d.                                                 | b.d.                                                 | b.d.                                                 | n.d.                                               | n.d.                                               | n.d.                                               | n.a.                                               | n.a.                                               | n.a.                                               |

**Table S2.**Clinical information of patients and tumors used in *ex vivo* assays.

| Patient ID | Date (MM/YYYY) | Sex    | Age | Primary site | Histology             | Type of specimen | Stage | Prior treatment                                                                  | Subsequent treatment                          | Time from first diagnosis to relapse and/or progression (mo) | In vitro responsive (Yes or No) |
|------------|----------------|--------|-----|--------------|-----------------------|------------------|-------|----------------------------------------------------------------------------------|-----------------------------------------------|--------------------------------------------------------------|---------------------------------|
| BS-172     | 04/2013        | male   | 67  | kidney       | clear cell carcinoma  | primary          | IV    | none                                                                             | votrient, radiotherapy                        | 44                                                           | N                               |
| BS-199     | 07/2013        | male   | 64  | lung         | adenocarcinoma        | metastasis       | IV    | erlotinib, surgery                                                               | none                                          | 29                                                           | N                               |
| BS-202     | 07/2013        | male   | 50  | liver        | pleomorphic carcinoma | metastasis       | IV    | none                                                                             | none                                          | 2                                                            | N                               |
| BS-217     | 09/2013        | male   | 39  | kidney       | clear cell carcinoma  | primary          | IV    | none                                                                             | temsirolimus, sunitinib, everolimus           | 7                                                            | N                               |
| BS-403     | 10/2019        | female | 67  | skin         | melanoma              | metastasis       | IV    | extremity perfusion, radiotherapy, ipilimumab, surgery, DTIC, nivolumab          | none                                          | 48                                                           | N                               |
| BS-494     | 01/2016        | female | 36  | skin         | melanoma              | metastasis       | IV    | BRAF/MEK inhibitors, surgery, ipilimumab, radiotherapy, pembrolizumab, nivolumab | none                                          | 8                                                            | N                               |
| BS-558     | 06/2016        | female | 79  | ovary        | adenocarcinoma        | primary          | IV    | chemotherapy                                                                     | bevacizumab, chemotherapy                     | 2                                                            | Y                               |
| BS-688     | 03/2017        | female | 47  | ovary        | adenocarcinoma        | primary          | III   | none                                                                             | chemotherapy, letrozol                        | in remission                                                 | N                               |
| BS-796     | 04/2018        | female | 62  | ovary        | adenocarcinoma        | primary          | III   | none                                                                             | chemotherapy                                  | in remission                                                 | N                               |
| BS-899     | 03/2019        | female | 80  | ovary        | adenocarcinoma        | primary          | IV    | chemotherapy                                                                     | none                                          | 20                                                           | N                               |
| BS-965     | 10/2019        | male   | 70  | lung         | squamous carcinoma    | primary          | I     | none                                                                             | none                                          | in remission                                                 | N                               |
| BS-969     | 10/2019        | female | 43  | ovary        | adenocarcinoma        | primary          | IV    | none                                                                             | chemotherapy, bevacizumab, letrozol, olaparib | in remission                                                 | N                               |
| BS-988     | 01/2020        | male   | 71  | lung         | squamous carcinoma    | primary          | III   | none                                                                             | chemotherapy                                  | in remission                                                 | N                               |
| BS-1014    | 03/2020        | female | 45  | lung         | adenocarcinoma        | primary          | IV    | none                                                                             | chemotherapy, radiotherapy                    | 7                                                            | Y                               |
| BS-1030    | 06/2020        | male   | 68  | lung         | adenocarcinoma        | primary          | II    | none                                                                             | chemotherapy                                  | in remission                                                 | Y                               |
| BS-1036    | 07/2020        | male   | 55  | skin         | melanoma              | metastasis       | IV    | ipilimumab, nivolumab                                                            | nivolumab                                     | in remission                                                 | Y                               |
| BS-1047    | 08/2020        | male   | 60  | lung         | adenocarcinoma        | primary          | III   | none                                                                             | chemotherapy                                  | 18                                                           | N                               |
| BS-1054    | 08/2020        | male   | 70  | lung         | squamous carcinoma    | primary          | I     | none                                                                             | none                                          | in remission                                                 | N                               |
| LA-062     | 07/2017        | male   | 86  | colon        | adenocarcinoma        | primary          | I     | none                                                                             | none                                          | in remission                                                 | N                               |
| LI-005     | 04/2019        | male   | 78  | colon        | adenocarcinoma        | primary          | II    | none                                                                             | none                                          | in remission                                                 | N                               |
| LI-043     | 03/2020        | female | 71  | colon        | adenocarcinoma        | primary          | III   | none                                                                             | none                                          | in remission                                                 | N                               |

**Table S3.**

Antibody panel for immunophenotyping of human tumor infiltrating lymphocytes from tumor suspensions.

| <b>Fluorochrome</b> | <b>Marker</b> | <b>Type</b>        |
|---------------------|---------------|--------------------|
| BUV395              | CCR7          | Lineage            |
| BUV737              | CD137         | Functional         |
| PE-CF594            | CD152         | Functional         |
| BUV563              | CD25          | Lineage/Functional |
| APC-H7              | CD3           | Lineage            |
| BUV496              | CD4           | Lineage            |
| Alexa Fluor 532     | CD45          | Lineage            |
| BV480               | CD45RO        | Lineage            |
| BUV661              | CD56          | Lineage            |
| BUV805              | CD8           | Lineage            |
| PE                  | CXCL13        | Functional         |
| PECy5.5             | FoxP3         | Lineage            |
| Alexa Fluor 700     | Granzyme-B    | Functional         |
| Pe fire 810         | HLA DR        | Functional         |
| BB700               | IFN- $\gamma$ | Functional         |
| BV711               | IL2           | Functional         |
| BV605               | Ki67          | Functional         |
| FITC                | LAG-3         | Functional         |
| BV421               | PD-1          | Functional         |
| AF647               | TCF7          | Lineage/Functional |
| BV650               | TIM-3         | Functional         |
| BV785               | TNFA          | Functional         |

**Table S4.**

List of significantly differentially expressed ( $p < 0.05$ ) markers on different populations comparing PD1-LAG3 to control isotype treatment. (Celltype\_marker indicates the celltype (before “\_”) on which each marker (after “\_”) is differentially expressed, AveExpr=average expression, logFC=log fold change, t=t statistic, adj.P.Val=adjusted p value).

| Celltype_marker        | logFC      | AveExpr  | t         | P.Value  | adj.P.Val  |
|------------------------|------------|----------|-----------|----------|------------|
| CD4+PD1+CXCL13+_LAG3   | 0.33333626 | 1.741619 | 7.396411  | 3.67E-06 | 0.00032996 |
| CD4+PD1+_PD1           | -0.2726836 | 3.03E+00 | -5.628036 | 6.57E-05 | 0.00295588 |
| Tregs_CD25             | 0.18925793 | 3.397877 | 5.172804  | 1.48E-04 | 0.00361943 |
| CD8+ T_PD1             | -0.3768561 | 2.86774  | -5.126959 | 1.61E-04 | 0.00361943 |
| CD4+PD1+CXCL13+_PD1    | -0.2480212 | 3.497264 | -4.89545  | 2.46E-04 | 0.00442931 |
| CD4+PD1+CXCL13+_CD25   | 0.35976388 | 2.335802 | 4.747422  | 3.24E-04 | 0.00446514 |
| CD4+PD1+CXCL13+_HLADR  | 0.26944116 | 2.195454 | 4.707644  | 3.49E-04 | 0.00446514 |
| CD8+ T_LAG3            | 0.27364816 | 1.753019 | 4.639339  | 3.97E-04 | 0.00446514 |
| Tregs_PD1              | -0.3290556 | 2.597169 | -4.479933 | 5.37E-04 | 0.00536541 |
| CD45lowPD1hi_PD1       | -0.254008  | 3.28E+00 | -4.419475 | 6.02E-04 | 0.00541778 |
| NK_HLADR               | 0.22610267 | 1.758442 | 3.376429  | 4.60E-03 | 0.03558052 |
| Tregs_HLADR            | 0.26006525 | 2.117816 | 3.360846  | 4.74E-03 | 0.03558052 |
| NK_IFNG                | 0.06685307 | 1.749416 | 3.22176   | 6.25E-03 | 0.0432322  |
| CD4+PD1+CXCL13+_IFNG   | 0.06978501 | 1.800012 | 3.18435   | 6.73E-03 | 0.0432322  |
| CD4+PD1+_HLADR         | 0.11646278 | 1.632634 | 3.128322  | 7.51E-03 | 0.04507382 |
| Tregs_IFNG             | 0.08063878 | 1.852872 | 3.062117  | 8.56E-03 | 0.04815769 |
| CD4+PD1+_LAG3          | 0.09984621 | 1.573094 | 2.998091  | 9.71E-03 | 0.05142509 |
| CD4+PD1+CXCL13+_CXCL13 | 0.17999464 | 3.302121 | 2.936842  | 1.10E-02 | 0.05479409 |
| CD45+HLADR+_HLADR      | 0.06441121 | 3.286862 | 2.872507  | 1.24E-02 | 0.05890787 |
| Tregs_KI67             | 0.05246488 | 1.916739 | 2.767427  | 1.53E-02 | 0.06875757 |
| Tregs_CXCL13           | -0.3239322 | 1.282663 | -2.57608  | 2.22E-02 | 0.09501202 |
| CD4+PD1+CXCL13+_KI67   | 0.04906689 | 1.957157 | 2.512575  | 2.51E-02 | 0.10251616 |
| CD45lowPD1hi_LAG3      | 0.10947494 | 1.666606 | 2.432141  | 2.92E-02 | 0.10854559 |
| CD4+PD1low_GRANZYMEB   | 0.04620489 | 1.915792 | 2.430089  | 2.94E-02 | 0.10854559 |
| Tregs_CTLA4            | 0.09390596 | 2.918667 | 2.416111  | 3.02E-02 | 0.10854559 |
| NK_LAG3                | 0.05476046 | 1.593892 | 2.296616  | 3.78E-02 | 0.13095925 |
| NK_KI67                | 0.05984958 | 1.889756 | 2.245442  | 4.17E-02 | 0.1388625  |
| Tregs_LAG3             | 0.05685661 | 1.570189 | 2.216983  | 4.39E-02 | 0.13887352 |
| CD8+ T_HLADR           | 0.08844332 | 1.831911 | 2.20725   | 4.47E-02 | 0.13887352 |

**Table S5.**

List of significantly differentially expressed ( $p < 0.05$ ) markers on different populations comparing PD1-TIM3 to control isotype treatment. (Celltype\_marker indicates the celltype (before “\_”) on which each marker (after “\_”) is differentially expressed, AveExpr=average expression, logFC=log fold change, t=t statistic, adj.P.Val=adjusted p value).

| Celltype_marker       | logFC      | AveExpr  | t         | P.Value    | adj.P.Val  |
|-----------------------|------------|----------|-----------|------------|------------|
| CD4+PD1+_PD1          | -0.2543429 | 3.03E+00 | -5.249496 | 0.00012882 | 0.0115936  |
| CD4+PD1+CXCL13+_PD1   | -0.2229616 | 3.497264 | -4.400823 | 6.24E-04   | 0.01984033 |
| CD4+PD1+CXCL13+_CD25  | 0.31489129 | 2.335802 | 4.155286  | 1.00E-03   | 0.01984033 |
| Tregs_CD25            | 0.14991551 | 3.397877 | 4.097496  | 1.12E-03   | 0.01984033 |
| CD4+PD1+CXCL13+_HLADR | 0.23285953 | 2.195454 | 4.068494  | 1.18E-03   | 0.01984033 |
| CD45lowPD1hi_PD1      | -0.2305264 | 3.28E+00 | -4.01092  | 0.00132269 | 0.01984033 |
| CD8+T_PD1             | -0.2737894 | 2.87E+00 | -3.724783 | 0.00231453 | 0.02975824 |
| Tregs_PD1             | -0.2643631 | 2.597169 | -3.599176 | 2.96E-03   | 0.03333915 |
| NK_HLADR              | 0.23637052 | 1.76E+00 | 3.52976   | 3.40E-03   | 0.03398195 |
| NK_KI67               | 0.08230755 | 1.889756 | 3.088022  | 8.13E-03   | 0.0732115  |
| CD8+T_CTLA4           | 0.05798453 | 1.47E+00 | 2.65671   | 1.90E-02   | 0.15513405 |
| CD4+PD1+_HLADR        | 0.09498435 | 1.63E+00 | 2.551387  | 2.33E-02   | 0.1743966  |

**Table S6.**

Antibodies used for flow cytometry analyses.

| Antibody             | Fluorochrome | Clone / ID | Vendor                    | Cat. No     |
|----------------------|--------------|------------|---------------------------|-------------|
| CD137                | BUV737       | 4B4-1      | BD Biosciences            | 741861      |
| CD223                | FITC         | 17B4       | LS Bio                    | LS-B2237-50 |
| CD25                 | BUV563       | 2A3        | BD Biosciences            | 612919      |
| CD3                  | APC-H7       | Sk7        | BD Biosciences            | 560275      |
| CD4                  | BUV496       | SK3        | BD Biosciences            | 612936      |
| CD45                 | AF532        | HI30       | Invitrogen                | 58-0459-42  |
| CD45RO               | BV480        | UCHL-1     | BD Biosciences            | 566192      |
| CD56                 | BUV661       | NCAM16.2   | BD Biosciences            | 750478      |
| CD8                  | BUV805       | SK1        | BD Biosciences            | 564912      |
| CXCL13               | PE           | 53610      | RnD systems               | IC801P      |
| FoxP3                | Pe-Cy5.5     | PCH101     | Invitrogen                | 35-4776-41  |
| Goat anti-rabbit IgG | BV421        | Poly1270   | BD Biosciences            | 565014      |
| Granzyme B           | AF700        | QA16A02    | BioLegend                 | 372222      |
| HLADR                | PeFire810    | mIH1       | BioLegend                 | custom      |
| IFN- $\gamma$        | BB700        | B27        | BD Biosciences            | 566395      |
| IL-2                 | BV711        | MQ1-17H12  | BioLegend                 | 500345      |
| Ki67                 | BV605        | Ki-67      | BioLegend                 | 350522      |
| Live dead            | Zombie UV    | none       | BioLegend                 | 423108      |
| Live dead            | Zombie Aqua  | none       | BioLegend                 | 423102      |
| PD1                  | none         | D4W2J      | Cell Signaling Technology | 86163       |
| TCF7                 | AF647        | 7f11a10    | BioLegend                 | 655204      |
| TNF $\alpha$         | BV785        | MAb11      | BioLegend                 | 502947      |



**Data file S1. (included as a separate file)**

Summary of sequencing statistics before quality check and filtering.

**Data file S2. (included as a separate file)**

scRNAseq cluster annotation table for each patient.

**Data file S3. (included as a separate file)**

Pseudo-bulk analysis output listing differentially expressed genes in each treatment to control comparison and in each cell type from scRNAseq dataset. Clusters were included in the analyses only when sufficient numbers of cells were present to allow for all treatment-control comparisons.

## References

1. M. Dai, X. Pei, X. J. Wang, Accurate and fast cell marker gene identification with COSG. *Brief Bioinform* **23**, (2022).
2. M. Sade-Feldman, K. Yizhak, S. L. Bjorgaard, J. P. Ray, C. G. de Boer, R. W. Jenkins, D. J. Lieb, J. H. Chen, D. T. Frederick, M. Barzily-Rokni, S. S. Freeman, A. Reuben, P. J. Hoover, A. C. Villani, E. Ivanova, A. Portell, P. H. Lizotte, A. R. Aref, J. P. Eliane, M. R. Hammond, H. Vitzthum, S. M. Blackmon, B. Li, V. Gopalakrishnan, S. M. Reddy, Z. A. Cooper, C. P. Paweletz, D. A. Barbie, A. Stemmer-Rachamimov, K. T. Flaherty, J. A. Wargo, G. M. Boland, R. J. Sullivan, G. Getz, N. Hacohen, Defining T Cell States Associated with Response to Checkpoint Immunotherapy in Melanoma. *Cell* **175**, 998-1013 e1020 (2018).
3. V. Bergen, M. Lange, S. Peidli, F. A. Wolf, F. J. Theis, Generalizing RNA velocity to transient cell states through dynamical modeling. *Nat Biotechnol* **38**, 1408-1414 (2020).
